# Supplementary material for: Fluorinase mediated C–18F bond formation, an enzymatic tool for PET labelling
Source: Royal Society of Chemistry journal article supplement (doi:10.1039/b516861a), 2006-01-01
Supplement: b516861a.pdf [file b516861a.pdf]

## Supplementary information:

### Fluorinase mediated C-<sup>18</sup>F bond formation, an enzymatic tool for PET labelling

Hai Deng<sup>1</sup>, Steven L. Cobb<sup>1</sup>, Anthony Gee<sup>2</sup>, Andrew Lockhart<sup>2</sup>, Laurent Martarello<sup>2\*</sup>, Ryan P. McGlinchey<sup>1</sup>, David O'Hagan<sup>1\*</sup>, and Mayca Onega<sup>1</sup>

#### Materials

L-Amino acid oxidase (*Crotalus adamanteus*, type I, E.C. 1.4.3.2. 0.3 unit/mg), 5'-adenylyc acid deaminase (*Aspergillus sp.*, 0.1 unit/mg), phytase (alkaline, Type VII-S, 2,000-4,000 DEA units/mg protein), L-methionine and S-adenosyl-L-methionine (SAM) were purchased from the Sigma Chemical Co, UK. Immobilised purine nucleotide phosphorylase beads were kindly donated by GlaxoSmithKline (Ulverston, UK). Recombinant 5'-FDAS was purified as previously described (*Nature.*, **2004**, *547*, 111-114)

#### Typical fluorinase reaction with [<sup>18</sup>F]-fluoride

A typical reaction mixture containing the fluorinase (8mg/ml at 100μL = 1.85x10<sup>-3</sup> unit), SAM 20mM (20 μl), [<sup>18</sup>F]HF (200-350 MBq in <sup>18</sup>O-water, 100 μl), L-amino acid oxidase (0.15 unit) or 5'-adenylyc acid deaminase (0.05 unit) (5'-FDI production) or immobilised PNP enzyme (~10 mg) and phytase (1.75 unit) was incubated at room temperature or 35 °C. The reaction product mixture was applied to the top of the packing bed of an anion exchange column (Alltech, SAX, 50mg), which had been pre-washed with deionized water (10ml). This resulted in an eluent containing the radioactive products.

#### Enzymatic radiolabelling assays for [<sup>18</sup>F]-5'-FDA and [<sup>18</sup>F]-5'-FDI

The ratio of the total radioactivity of eluent against the radioactivity retained (unreacted [<sup>18</sup>F]-fluoride) on the column was used to calculate the total yield of radioactive product. This fraction was then loaded onto a reverse phase Spheracelone 5μ ODS(2) column (Phenomenex, 250 x 4.6 mm) and the column eluted (1 ml/min) isocratically with NaH<sub>2</sub>PO<sub>4</sub> (70mM) solution and acetonitrile (90:10 v/v) over a 10 min period. The eluent was monitored simultaneously by UV (260nm, Beckman Coulter, System Gold 168 Detector) and by radioactivity using a Packard Flow Scintillation Analyzer. For the production of [<sup>18</sup>F]-5'-FDA only two radiochemical activities were detected, the predominant one corresponded to [<sup>18</sup>F]-5'-FDA and the minor one (retention time = 2.5 min) equated to some [<sup>18</sup>F]-fluoride bound to protein leaked from the anion exchange column (see Figure 1). For the production of [<sup>18</sup>F]-5'-FDI, three radiochemical products were detected, two corresponded to [<sup>18</sup>F]-5'-FDI and [<sup>18</sup>F]-5'-FDA and the other was again [<sup>18</sup>F]-fluoride bound to protein leaked from the anion exchange column (see Figure 2). The retention times of [<sup>18</sup>F]-5'-FDA and [<sup>18</sup>F]-5'-FDI were 5.6 min and 3.6 min respectively.

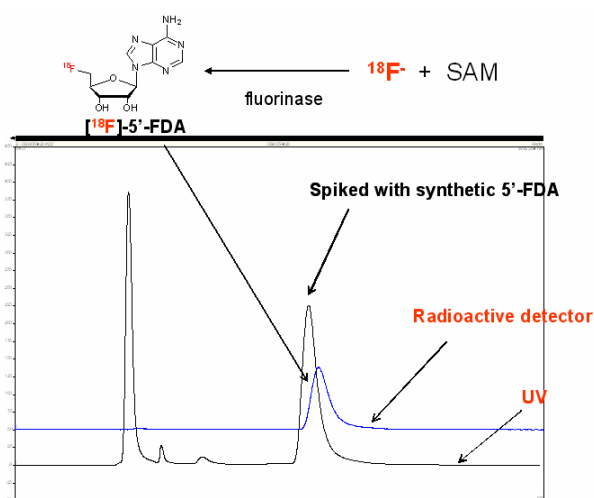

**Fig1.** A HPLC chromatograph showing both UV and radioactivity detector outputs for the production of [ $^{18}\text{F}$ ]-5'-FDA (RT = 5.6 min) after fluorinase incubation.

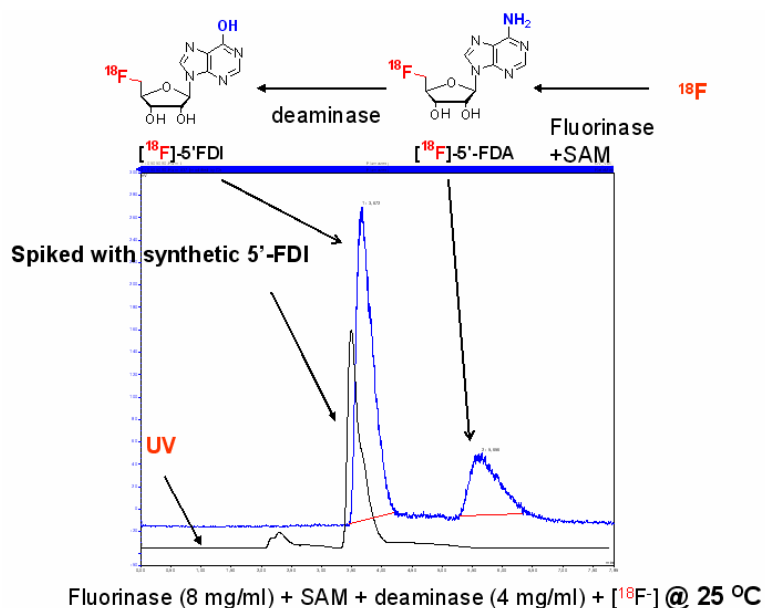

**Fig 2.** A HPLC chromatograph showing both UV and radioactivity detector outputs for the production of [ $^{18}\text{F}$ ]-5'-FDI and [ $^{18}\text{F}$ ]-5'-FDA (RT = 5.6 and 3.6 min, respectively) in a coupled enzyme system (fluorinase + deaminase).

### Enzymatic radiolabelling assay for [ $^{18}\text{F}$ ]-5-FDR

The radioactive fraction eluted from the anion exchange column was injected onto a Dionex CarboPac column (PA 100) and eluted (0.5 ml/min) using an isocratic mobile phase of NaOH (0.5 M) for 10 min. Only two radiochemical activities were detected as illustrated in Figure 3. One corresponded to [ $^{18}\text{F}$ ]-5-FDR (retention time of 2.8min). The other at a retention time of 2.3 min was a combination of [ $^{18}\text{F}$ ]-5'-FDA and [ $^{18}\text{F}$ ]-fluoride attached to the protein which had leaked from the anion exchange column.

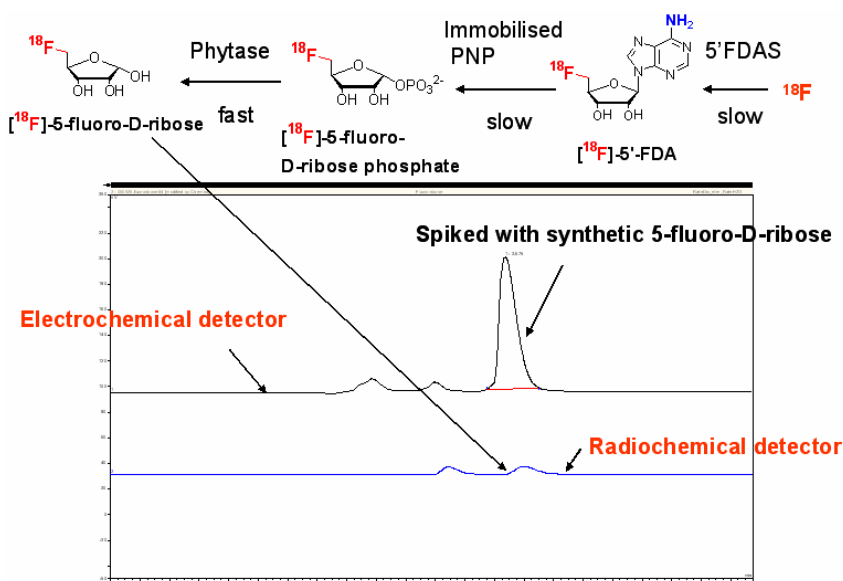

# Supplementary Material (ESI) for Chemical Communications

# This journal is (c) The Royal Society of Chemistry 2006

**Fig. 3** A HPLC chromatography coupled with electrochemical and radioactivity detectors for the production of [ $^{18}\text{F}$ ]-5-FDR (RT = 2.8 min). Two radiochemical peaks were evident one of which is [ $^{18}\text{F}$ ]-5-FDR and the other is polar [ $^{18}\text{F}$ ]-fluoride/enzyme material.
